# Supplementary material
Source: publisher figshare collection journal article supplement (https://karger.figshare.com/ndownloader/files/23347151)
Supplement: Supplementary file 1 [file 23347151]

**Supplementary data**

**Univariate and multivariate analyses per SF-36 subscales**

|  | Univariate analysis | | | Multivariable analysis | | |
| --- | --- | --- | --- | --- | --- | --- |
| **Physical functioning** | Β  (unstandardized) | 95% CI | P values | Β  (unstandardized) | 95% CI | P |
| Employment | 22.9 | 16.8, 29.0 | <0.001 | 20.1 | 12.6, 27.5 | <0.001 |
| Age | -0.5 | -0.72,0.34 | <0.001 | -0.05 | -4.2, 4.1 | 0.98 |
| Years of MEN1 diagnosis | -0.6 | -0.9, -0.2 | 0.001 | -0.3 | -0.7, 0.03 | 0.07 |
| Presymptomatic diagnosis | 6.3 | 0.3,12.3 | 0.04 | -3.6 | -10.5, 3.2 | 0.3 |
| Index case | -6.8 | -13.9,0.24 | 0.06 | -6.8 | -14.6, 0.9 | 0.8 |
| Education level | 10.6 | 4.5,16.6 | 0.001 | 4.9 | -1.0, 10.7 | 0.12 |
| Pituitary tumor | -2.6 | -8.9,3.7 | 0.4 |  |  |  |
| pNET | -3.3 | -9.4,2.8 | 0.3 |  |  |  |
| pHPT | -6.1 | -14.3, 2.2 | 0.2 |  |  |  |

|  | Univariate analysis | | | Multivariable analysis | | |
| --- | --- | --- | --- | --- | --- | --- |
| **Social functioning** | Β  (unstandardized) | 95% CI | P values | Β  (unstandardized) | 95% CI | P |
| Employment | 12.6 | 5.3, 19.9 | 0.01 | 11.8 | 4.6, 19.0 | 0.002 |
| Age | -0.18 | -0.4, 0.1 | 0.1 |  |  |  |
| Years of MEN1 diagnosis | -0.2 | -0.6, 0.2 | 0.3 |  |  |  |
| Presymptomatic diagnosis | 4.7 | -2.1, 11.4 | 0.2 |  |  |  |
| Index case | -10.0 | -17.9, -2.1 | 0.01 | -7.1 | -15.0, 0.7 | 0.08 |
| Education level | 5.3 | -1.5, 12.0 | 0.1 |  |  |  |
| Pituitary tumor | -7.9 | -14.7, -1.0 | 0.02 | -6.7 | -13.4, 0.04 | 0.05 |
| pNET | -1.5 | -8.3, 5.2 | 0.7 |  |  |  |
| pHPT | -6.2 | -15.3, 2.9 | 0.2 |  |  |  |

|  | Univariate analysis | | | Multivariable analysis | | |
| --- | --- | --- | --- | --- | --- | --- |
| **Role physical functioning** | Β  (unstandardized) | 95% CI | P values | Β  (unstandardized) | 95% CI | P |
| Employment | 24.1 | 12.0, 36.3 | <0.001 | 62.1 | 46.6, 77.7 | <0.001 |
| Age | -0.3 | -0.7, 0.04 | 0.08 |  |  |  |
| Years of MEN1 diagnosis | -0.8 | -1.4, -0.1 | 0.03 | -0.3 | -0.9, 0.4 | 0.4 |
| Presymptomatic diagnosis | 8.9 | -2.4, 20.2 | 0.1 |  |  |  |
| Index case | -11.6 | -24.9, 1.8 | 0.09 |  |  |  |
| Education level | 6.4 | -5.0, 17.8 | 0.3 |  |  |  |
| Pituitary tumor | -18.0 | -29.3, -6.6 | 0.002 | -19.1 | -30.3, -7.8 | 0.001 |
| pNET | -8.0 | -19.3, 3.4 | 0.2 |  |  |  |
| pHPT | -11.2 | -26.4, 4.1 | 0.2 |  |  |  |

|  | Univariate analysis | | | Multivariable analysis | | |
| --- | --- | --- | --- | --- | --- | --- |
| **Vitality** | Β  (unstandardized) | 95% CI | P values | Β  (unstandardized) | 95% CI | P |
| Employment | 10.4 | 3.8, 17.0 | <0.001 | 10.1 | 3.6, 16.6 | 0.002 |
| Age | -0.1 | -0.3, 0.11 | 0.4 |  |  |  |
| Years of MEN1 diagnosis | -0.3 | -0.6, 0.08 | 0.13 |  |  |  |
| Presymptomatic diagnosis | 4.6 | -1.5, 10.7 | 0.14 |  |  |  |
| Index case | -2.9 | -10.1, 4.3 | 0.4 |  |  |  |
| Education level | 3.6 | -2.5, 9.7 | 0.3 |  |  |  |
| Pituitary tumor | -8.6 | -14.7, -2.5 | 0.006 | -8.3 | -14.3, -2.3 | 0.007 |
| pNET | -4.8 | -10.9, 1.2 | 0.1 |  |  |  |
| pHPT | -6.7 | -14.9, 1.4 | 0.1 |  |  |  |

|  | Univariate analysis | | | Multivariable analysis | | |
| --- | --- | --- | --- | --- | --- | --- |
| **Mental health** | Β  (unstandardized) | 95% CI | P values | Β  (unstandardized) | 95% CI | P |
| Employment | 8.5 | 3.2- 13.8 | 0.002 | 8.3 | 3.1, 13.6 | 0.002 |
| Age | -0.09 | -0.3, 0.08 | 0.3 |  |  |  |
| Years of MEN1 diagnosis | 0.03 | -0.3, 0.8 | 0.8 |  |  |  |
| Presymptomatic diagnosis | 4.3 | -0.6, 0.2 | 0.09 |  |  |  |
| Index case | -3.9 | -9.8, 1.9 | 0.18 |  |  |  |
| Education level | 1.8 | -3.1, 6.7 | 0.5 |  |  |  |
| Pituitary tumor | -5.0 | -10.0, -0.07 | 0.05 | -4.8 | -9.6, 0.06 | 0.05 |
| pNET | -0.9 | -5.8, 4.0 | 0.7 |  |  |  |
| pHPT | -5.6 | -12.2, 0.9 | 0.09 |  |  |  |

|  | Univariate analysis | | | Multivariable analysis | | |
| --- | --- | --- | --- | --- | --- | --- |
| **Emotional functioning** | Β  (unstandardized) | 95% CI | P values | Β  (unstandardized) | 95% CI | P |
| Employment | 0.6 | -1.9, 21.1 | 0.1 |  |  |  |
| Age | 0.2 | -0.1, 0.5 | 0.2 |  |  |  |
| Years of MEN1 diagnosis | 0.4 | -0.2, 1.0 | 0.2 |  |  |  |
| Presymptomatic diagnosis | 5.4 | -5.0, 15.9 | 0.3 |  |  |  |
| Index case | -18.0 | -30.2, -5.9 | 0.004 | -15.0 | -27.2, -2.8 | 0.02 |
| Education level | -0.7 | -11.1, 9.8 | 0.9 |  |  |  |
| Pituitary tumor | -16.9 | -27.3, -6.5 | 0.002 | -14.2 | -24.8, -3.7 | 0.008 |
| pNET | 2.0 | -8.4, 12.4 | 0.7 |  |  |  |
| pHPT | -5.3 | -19.3, 8.7 | 0.5 |  |  |  |

|  | Univariate analysis | | | Multivariable analysis | | |
| --- | --- | --- | --- | --- | --- | --- |
| **Bodily pain** | Β  (unstandardized) | 95% CI | P values | Β  (unstandardized) | 95% CI | P |
| Employment | 13.1 | 7.1, 19.2 | <0.001 | 11.4 | 3.8, 18.9 | 0.003 |
| Age | -0.3 | -0.5, -0.1 | 0.001 | -0.4 | -4.4, 3.5 | 0.8 |
| Years of MEN1 diagnosis | -0.2 | -0.5, 0.2 | 0.3 |  |  |  |
| Presymptomatic diagnosis | 1.3 | -4.5, 7.0 | 0.7 |  |  |  |
| Index case | -2.8 | -9.7, 4.0 | 0.4 |  |  |  |
| Education level | 6.0 | 0.3, 11.7 | 0.04 | 2.6 | -3.3, 8.5 | 0.4 |
| Pituitary tumor | -5.3 | -11.1, 0.5 | 0.08 |  |  |  |
| pNET | -2.3 | -8.3, 3.2 | 0.4 |  |  |  |
| pHPT | -1.6 | -9.3, 6.1 | 0.7 |  |  |  |

|  | Univariate analysis | | | Multivariable analysis | | |
| --- | --- | --- | --- | --- | --- | --- |
| **General health** | Β  (unstandardized) | 95% CI | P values | Β  (unstandardized) | 95% CI | P |
| Employment | 12.3 | 6.3, 18.3 | <0.001 | 12.1 | 5.6, 18.6 | <0.001 |
| Age | -0.2 | -0.4, -0.1 | 0.05 |  |  |  |
| Years of MEN1 diagnosis | 54.9 | 49.6, 60.2 | <0.001 | 0.1 | -0.2, 0.4 | 0.6 |
| Presymptomatic diagnosis | 4.6 | -1.0, 10.2 | 0.2 |  |  |  |
| Index case | -4.2 | -10.8, 2.4 | 0.2 |  |  |  |
| Education level | 3.7 | -1.9, 0.3 | 0.2 |  |  |  |
| Pituitary tumor | -6.1 | -11.8, -0.4 | 0.04 | -5.6 | -11.4, 0.2 | 0.06 |
| pNET | -4.9 | -10.4, 0.7 | 0.09 |  |  |  |
| pHPT | -9.0 | -16.5, -1.5 | 0.02 | -5.1 | -13.2, 3.0 | 0.2 |
